# Supplementary material
Source: publisher figshare collection journal article supplement (https://karger.figshare.com/ndownloader/files/13674365)
Supplement: Supplementary file 1 [file 13674365]

Supplementary Table 1. The full name, abbreviation and UniProt ID of all AMPs detected in saliva in this study.

| Antimicrobial peptide | Abbreviation | UniProt ID |
| --- | --- | --- |
| ADM | ADM | P35318 |
| Antileukoproteinase | SLPI | P03973 |
| Bactericidal permeability-increasing protein | BPI | P17213 |
| Bactericidal permeability-increasing protein precursor CAP57 | BPI CAP57 | P17213 |
| Beta-2-microglobulin | B2M | P61769 |
| Beta-defensin 118 | B-def118 | Q96PH6 |
| Beta-defensin 126 | B-def126 | Q9BYW3 |
| Beta-defensin 127 | B-def127 | Q9H1M4 |
| Beta-defensin 128 | B-def128 | Q7Z7B8 |
| Beta-defensin 131 precursor | B-def131 | P59861 |
| Bone-marrow proteoglycan precursor | BMPG | P13727 |
| BPI fold-containing family A member 1 | BPIA1A | Q9NP55 |
| BPI fold-containing family A member 2 | BPIA2 | Q96DR5 |
| BPI fold-containing family B member 1 | BPIB1 | Q8TDL5 |
| BPI fold-containing family B member 3 | BPIB3 | P59826 |
| BPI fold-containing family B member 4 | BPIB4 | P59827 |
| Calcitonin gene-related peptide 1 precursor | CGRP | P06881 |
| Cathelicidin antimicrobial peptide | Cathelicidin | P49913 |
| C-C motif chemokine 28 | CCC28 | Q9NRJ3 |
| Cystatin SN precursor | Cystain SN | P01037 |
| Cystatin-A | Cystatin A | P01040 |
| Cystatin-B | Cystatin B | P04080 |
| Cystatin-C | Cystatin C | P01034 |
| Cystatin-D | Cystatin D | P28325 |
| Cystatin-S | Cystatin S | P01036 |
| Cystatin-SA | Cystatin SA | P09228 |
| Deleted in malignant brain tumors 1 protein | DMBT1 | Q9UGM3 |
| Dermcidin | Dermcidin | P81605 |
| Eosinophil cationic protein precursor | ECP | P12724 |
| Eosinophil peroxidase | EPX | P11678 |
| Fibroblast growth factor 2 | FGF2 | D9ZGF5 |
| Fibronectin precursor | Fibronectin | P02751 |
| Galectin-3 | Galectin3 | P17931 |
| Hepcidin | Hepcidin | P81172 |
| Histone H2A type 2-A | HistoneH2A | Q6FI13 |
| Histone H2B type 2-E | Histone2B2 | Q16778 |
| Histone H2B type F-S | HistoneH2B | P57053 |
| Lactoperoxidase | Lactoperoxidase | P22079 |
| Lactotransferrin | Lactotransferrin | P02788 |
| Lipocalin-1 | Lipocalin1 | P31025 |
| Lysozyme C | Lysozyme C | P61626 |
| Mucin-7 precursor | Mucin7 | Q8TAX7 |
| Myeloperoxidase | Myeloperoxidase | P05164 |
| Neutrophil defensin 1 | aDEF1 | P59665 |
| Peptidoglycan recognition protein 1 | PGLYRP1 | O75594 |
| Peptidoglycan recognition protein 3 | PGLYRP3 | Q96LB9 |
| Peptidoglycan recognition protein 4 | PGLYRP4 | Q96LB8 |
| Perforin-1 | PRF1 | P14222 |
| Platelet basic protein | PPBP | P02775 |
| Prolactin-inducible protein | PIP | P12273 |
| Pro-neuropeptide Y | Neuropeptide Y | P01303 |
| Protachykinin-1 | Protachykinin | P20366 |
| Protein S100-A7 | ProteinS100A7 | P31151 |
| Protein S100-A8 | ProteinS100A8 | P05109 |
| Protein S100-A9 | ProteinS100A9 | P06702 |
| Protein-arginine deiminase type-2 | PADI2 | Q9Y2J8 |
| Protein-arginine deiminase type-4 | PADI4 | Q9UM07 |
| Pulmonary surfactant-associated protein A1 | SFTPA1 | Q8IWL2 |
| Ribonuclease A family, 7, isoform CRA | Ribonuclease 7 | D3DS13 |
| Sperm-associated antigen 4 protein | SPAG4 | Q9NPE6 |
| Serotransferrin | Serotransferrin | P02787 |
| WAP four-disulfide core domain protein 12 | WFD12 | Q8WWY7 |
| VIP peptides | VIPpeptides | P01282 |
